# Supplementary material for: A meta-analysis of the effect of new-media interventions on sexual-health behaviours
Source: HighWire-hosted journal article supplement (doi:10.1136/sextrans-2014-051743), 2014-11-28
Supplement: sextrans-2014-051743supp.pdf [file sextrans-2014-051743supp.pdf]

## Supplementary material

### *Description of moderator analysis in random effects model*

A random effects model generates information about the extent to which moderators influence the true effect sizes[1], and the extent to which moderator variables explain variation between studies and thus account for heterogeneity in the overall effect size. For categorical moderators, studies are categorised based on a particular characteristic (i.e. type of new-media), and all effect sizes falling in to a particular category are analysed together. If the effect size for a category of effects is significant, and is homogenous, this characteristic is said to account for heterogeneity in the overall effect size, i.e., it explains why there are discrepancies in the size of effects included in the meta-analysis.

### *Description of publication bias using the Fail Safe N and Duval and Tweedie's Trim and Fill*

Publication bias refers to the phenomenon that non-significant studies may be missing from the analysis because they are not published. The Fail-safe N procedure estimates the number of studies with non-significant effects that would need to be included in the analysis to nullify the observed effect. A larger Fail-safe N is desirable[2].

Duval and Tweedie's The Trim and Fill method accounts for 'small study' effects[3]. Small study bias refers to the tendency for studies with small sample sizes but significant results to be included in published data sets, whereas studies with small sample sizes and null effects are less likely to be published. The inclusion of studies with small sample sizes and disproportionately large effects that are not

evenly distributed around the observed effect size may skew the effect size. The Trim and Fill method removes these small studies and 'fills' the distribution with hypothetical studies to revolve the uneven distribution. To the extent that the averaged corrected effect size remains unchanged after the application of the Trim and Fill, evidence exists that the sample of studies is unaffected by the small-study bias[4].

1. Hunter JE, Schmidt FL. Fixed Effects vs. Random Effects Meta - Analysis Models: Implications for Cumulative Research Knowledge. *International Journal of Selection and Assessment* 2000;**8**(4):275-92 doi: 10.1111/1468-2389.00156.
2. Rosenberg MS. The file-drawer problem revisited: A general weighted method for calculating fail-safe numbers in meta-analysis. *Evolution* 2005;**59**(2):464-68 doi: 10.1111/j.0014-3820.2005.tb01004.x.
3. Duval S, Tweedie R. Trim and Fill: A Simple Funnel Plot–Based Method of Testing and Adjusting for Publication Bias in Meta-Analysis. *Biometrics* 2000;**56**(2):455-63 doi: 10.1111/j.0006-341X.2000.00455.x.
4. Egger M, Smith GD, Schneider M, et al. Bias in meta-analysis detected by a simple, graphical test. *British Medical Journal* 1997;**315**:629-34 doi: 10.1136/bmj.315.7109.629.

**Table 1** List of search terms included in search strategy

| Topic      | Database | Subject Headings                                                                                                                                                   | Keywords                                                                                                                                                                                                                                                                                                                                                                          |
|------------|----------|--------------------------------------------------------------------------------------------------------------------------------------------------------------------|-----------------------------------------------------------------------------------------------------------------------------------------------------------------------------------------------------------------------------------------------------------------------------------------------------------------------------------------------------------------------------------|
| Technology | Medline  | Explode "internet"/all subheadings<br><br>Explode telecommunications/ Electronic email,<br><br>Computers, handheld.<br><br>Explode Cellular phone/ all subheadings | Internet<br>Web-base*<br>Online<br>Internet-based*<br>Social Media<br>Telemedicine<br>Blogging<br>"Social Networking Sites"<br>SNS<br>eHealth<br>"digital media"<br>Gaming<br>"online Gaming"<br>"mobile phone"<br>"cell* phone"<br>"short messaging service"<br>SMS<br>"text message"<br>"mobile cell phone"<br>MCP<br>iPhone<br>Android<br>"smart phone"<br>"phone application" |

|               |                                                                                                                                                                               |              |                                                      |
|---------------|-------------------------------------------------------------------------------------------------------------------------------------------------------------------------------|--------------|------------------------------------------------------|
|               |                                                                                                                                                                               |              | app<br>"phone app"<br>Facebook<br>Twitter<br>Myspace |
| PsychINFO     | Explode "internet"/all subheadings<br>Explode electronic communication / all subheadings<br>Cellular phones<br>Information technology<br>Websites<br>Technology<br>Innovation |              |                                                      |
| EMBASE        | Internet<br>Mobile Phone<br>e-mail<br>Text messaging<br>Social Media<br>Webcast Internet                                                                                      |              |                                                      |
| Global Health | Explode "internet"/all subheadings<br>Explode computer / all subheadings<br>Mobile telephones<br>Information technology<br>Technology<br>Innovation                           |              |                                                      |
| Sexual        | Medline                                                                                                                                                                       | Reproductive | "Reproductive health"                                |

|           |                                                                                                                                         |                                                                                                                                                                                                                     |                                                                                                                                                                                                                                                                                                                          |
|-----------|-----------------------------------------------------------------------------------------------------------------------------------------|---------------------------------------------------------------------------------------------------------------------------------------------------------------------------------------------------------------------|--------------------------------------------------------------------------------------------------------------------------------------------------------------------------------------------------------------------------------------------------------------------------------------------------------------------------|
| Health    |                                                                                                                                         | Health<br>Safe Sex<br>Unsafe sex<br>Sex Education<br>Health behavior<br>Condoms<br>Contraception<br>Sexually transmitted disease<br>contraception barrier<br>contraceptive devices, male.<br>contraception behavior | "sex* health"<br>"sex education"<br>"sex ed"<br>"screen* adj2 sex*"<br>"test* adj2 sex*"<br>Safe sex<br>unsafe sex<br>protected sex<br>unprotected sex<br>Condom* adj2 use<br>Male contraceptive device<br>Contraception<br>Prophalactic<br>STD<br>STI<br>Sexually transmitted disease<br>Sexually transmitted infection |
| PsychINFO | Psychosexual behaviour<br>Sex education<br>Safe sex<br>sexual risk taking<br>Condoms<br>Sexually transmitted disease<br>AIDS prevention |                                                                                                                                                                                                                     |                                                                                                                                                                                                                                                                                                                          |
| EMBASE    | Sexual health<br>Safe Sex<br>Unsafe sex explode/all                                                                                     |                                                                                                                                                                                                                     |                                                                                                                                                                                                                                                                                                                          |

|                       |                                                                                                              |                      |                                                             |
|-----------------------|--------------------------------------------------------------------------------------------------------------|----------------------|-------------------------------------------------------------|
|                       | subheadings<br>Condom Use<br>sexually transmitted disease<br>contraception<br>sexual education               |                      |                                                             |
| Global Health         | Sexual health<br>Sex education<br>Safer sex<br>sexual risk taking<br>Condoms<br>Sexually transmitted disease |                      |                                                             |
| Intervention Studies. | Medline                                                                                                      | Intervention Studies | Intervention Program<br>Study<br>Effect<br>Service<br>Trial |
| PsycINFO              | Intervention Studies<br>Experimentation                                                                      |                      |                                                             |
| EMBASE                | Intervention Studies<br>Experiments                                                                          |                      |                                                             |
| Global Helath         | Intervention studies<br>Experimental study                                                                   |                      |                                                             |
